# Supplementary material
Source: Springer Nature journal article supplement (https://www.springermedizin.de/resource/supplementary/12884_2013_1047_MOESM1_ESM.pdf/9458794)
Supplement: MOESM1 [file 9458794]

**Additional File 1: Four key policies by country**

| Country                  | Type of policy | Guideline topic area |                               |                         |                    | Total policies |
|--------------------------|----------------|----------------------|-------------------------------|-------------------------|--------------------|----------------|
|                          |                | Pre-pregnancy weight | Routine weighing in pregnancy | Gestational weight gain | Post-partum weight |                |
| Argentina                | Formal         |                      | X                             | X                       |                    | 2              |
| Australia                | Formal         |                      |                               |                         |                    | 0              |
| Belgium                  | Formal         | X                    | X                             |                         |                    | 2              |
| Bolivia                  | Formal         |                      | X                             | X                       |                    | 2              |
| Brazil                   | Formal         |                      | X                             | X                       |                    | 2              |
| Bulgaria                 | Formal         | X                    | X                             | X                       |                    | 3              |
| Burma                    | Formal         |                      | X                             | X                       |                    | 2              |
| Canada                   | Formal         | X                    | X                             | X                       |                    | 3              |
| Chile                    | Formal         | X                    | X                             | X                       | X                  | 4              |
| China                    | Formal         |                      | X                             | X                       | X                  | 3              |
| Costa Rica               | Formal         |                      | X                             |                         |                    | 1              |
| Croatia                  | Formal         |                      | X                             | X                       |                    | 2              |
| Cuba                     | Formal         | X                    | X                             | X                       | X                  | 4              |
| Denmark                  | Formal         |                      | X                             | X                       |                    | 2              |
| Ecuador                  | Formal         |                      | X                             | X                       |                    | 2              |
| Finland                  | Formal         |                      | X                             |                         |                    | 1              |
| France                   | Formal         |                      | X                             | X                       |                    | 2              |
| Guatemala                | Formal         |                      | X                             | X                       |                    | 2              |
| Honduras                 | Formal         | X                    | X                             | X                       |                    | 3              |
| India                    | Formal         | X                    | X                             | X                       |                    | 3              |
| Iran                     | Formal         |                      | X                             | X                       |                    | 2              |
| Ireland                  | Formal         | X                    |                               |                         |                    | 1              |
| Italy                    | Formal         | X                    | X                             | X                       | X                  | 4              |
| Japan                    | Formal         | X                    | X                             | X                       |                    | 3              |
| Netherlands              | Formal         | X                    |                               |                         |                    | 1              |
| Nicaragua                | Formal         | X                    | X                             | X                       |                    | 3              |
| Norway                   | Formal         |                      | X                             |                         |                    | 1              |
| Paraguay                 | Formal         |                      | X                             | X                       |                    | 2              |
| Peru                     | Formal         |                      | X                             | X                       |                    | 2              |
| Poland                   | Formal         | X                    | X                             | X                       |                    | 3              |
| Portugal                 | Formal         | X                    | X                             | X                       |                    | 3              |
| Romania                  | Formal         | X                    | X                             | X                       | X                  | 4              |
| Russian Federation       | Formal         |                      | X                             | X                       |                    | 2              |
| South Africa             | Formal         |                      |                               | X                       |                    | 1              |
| Sweden                   | Formal         |                      | X                             |                         | X                  | 2              |
| Switzerland              | Formal         |                      | X                             | X                       |                    | 2              |
| United Kingdom           | Formal         | X                    |                               |                         | X                  | 2              |
| United States of America | Formal         | X                    | X                             | X                       |                    | 3              |

|                             |          |   |   |   |  |   |
|-----------------------------|----------|---|---|---|--|---|
| <b>Uruguay</b>              | Formal   | X | X | X |  | 3 |
| <b>Vietnam</b>              | Formal   | X | X | X |  | 3 |
| <b>Bangladesh</b>           | Informal |   | X |   |  | 1 |
| <b>Germany</b>              | Informal |   |   |   |  | 0 |
| <b>Ghana</b>                | Informal |   | X | X |  | 2 |
| <b>Lithuania</b>            | Informal |   | X |   |  | 1 |
| <b>Mexico</b>               | Informal | X | X |   |  | 2 |
| <b>New Zealand</b>          | Informal |   |   |   |  | 0 |
| <b>Oman</b>                 | Informal |   |   | X |  | 1 |
| <b>Pakistan</b>             | Informal |   | X |   |  | 1 |
| <b>Scotland</b>             | Informal | X |   |   |  | 1 |
| <b>Tanzania</b>             | Informal |   | X |   |  | 1 |
| <b>United Arab Emirates</b> | Informal | X | X |   |  | 2 |
| <b>Venezuela</b>            | Informal |   |   |   |  | 0 |
| <b>Zambia</b>               | Informal |   | X |   |  | 1 |
